# Supplementary material
Source: HighWire-hosted journal article supplement (https://bjo.bmj.com/content/108/2/232)
Supplement: inline-supplementary-material-1 [file inline-supplementary-material-1.pdf]

**Supplemental Table 1. Current Procedural Terminology (CPT) codes for identification of intraocular surgeries**

| <b>Surgery Type</b> | <b>Subgroup</b>      | <b>CPT codes</b>                                                     |
|---------------------|----------------------|----------------------------------------------------------------------|
| Cataract            | Standard             | 66982, 66984                                                         |
|                     | Other                | 66850, 66920, 66930, 66940, 66983                                    |
| Corneal Transplant  | PK                   | 65730, 65750, 65755                                                  |
|                     | EK                   | 65756                                                                |
|                     | ALK                  | 65710                                                                |
|                     | Keratoprosthesis     | 65770                                                                |
| Secondary IOL       | IOL insertion alone  | 66985                                                                |
| Retina              | IOL exchange         | 66986                                                                |
|                     | PPV + RD repair      | 67108, 67113                                                         |
|                     | PPV + Laser          | 67039, 67040                                                         |
|                     | PPV + Membrane peel  | 67041, 67042, 67043                                                  |
|                     | Silicone oil removal | 67121                                                                |
| Glaucoma            | Trabeculectomy       | 66170, 66172                                                         |
|                     | Tube shunt           | 66179, 66180                                                         |
|                     | MIGS                 | 0191T, 0253T, 0450T, 0474T, 65820, 65850, 65865, 66174, 66175, 66186 |

ALK=anterior lamellar keratoplasty; EK=endothelial keratoplasty; IOL=intraocular lens; MIGS=minimally invasive glaucoma surgery; PK=penetrating keratoplasty; PPV=pars plana vitrectomy; RD=retinal detachment

**Supplemental Table 2. Current Procedural Terminology (CPT) codes for identification of additional intraocular surgeries for exclusion**

| <b>Category</b>          | <b>CPT codes</b>                                                                                                                                                |
|--------------------------|-----------------------------------------------------------------------------------------------------------------------------------------------------------------|
| Open globe injury repair | 65235, 65260, 65265, 65270, 65275, 65280, 65285, 65296                                                                                                          |
| Other cornea             | 65765, 65767                                                                                                                                                    |
| Other anterior segment   | 65815, 65870, 65875, 65880, 65900, 65920, 65930, 66225, 66250, 66600, 66605, 66635, 66680, 66682, 66740, 66770, 66820, 66825, 66830, 66840, 66999, 67005, 67010 |
| Other glaucoma           | 0449T, 66150, 66155, 66160, 66161, 66183, 66184, 66185, 66500, 66505, 66625, 66630, 66711, 66987, 66988, 67120                                                  |
| Other retina             | 66852, 67025, 67027, 67030, 67036, 67299                                                                                                                        |

**Supplemental Table 3. International Classification of Diseases, Tenth Revision-Clinical Modification (ICD-10 CM) codes for identification of endophthalmitis**

|                                       | <b>ICD-10-CM codes</b> |
|---------------------------------------|------------------------|
| Purulent endophthalmitis, unspecified | H44.001 (right eye)    |
|                                       | H44.002 (left eye)     |
|                                       | H44.003 (bilateral)    |
|                                       | H44.009 (unspecified)  |
| Panophthalmitis                       | H44.011 (right eye)    |
|                                       | H44.012 (left eye)     |
|                                       | H44.013 (bilateral)    |
|                                       | H44.019 (unspecified)  |
| Vitreous abscess                      | H44.021 (right eye)    |
|                                       | H44.022 (left eye)     |
|                                       | H44.023 (bilateral)    |
|                                       | H44.029 (unspecified)  |
| Other endophthalmitis                 | H44.19                 |

**Supplemental Table 4. Endophthalmitis rates and day of diagnosis postoperatively after intraocular surgery stratified by patient characteristics in Medicare beneficiaries from 2016 to 2019**

|                 | Number of surgeries | Endophthalmitis cases | Endophthalmitis rate (%) |
|-----------------|---------------------|-----------------------|--------------------------|
| Age (yrs)       |                     |                       |                          |
| 65-74           | 5279624             | 4345                  | 0.08                     |
| 75-84           | 3764105             | 3444                  | 0.09                     |
| 85+             | 700671              | 866                   | 0.12                     |
| Sex             |                     |                       |                          |
| Male            | 3921725             | 4001                  | 0.10                     |
| Female          | 5822675             | 4654                  | 0.08                     |
| Race            |                     |                       |                          |
| White           | 8184667             | 7226                  | 0.09                     |
| Asian           | 215931              | 172                   | 0.08                     |
| Black           | 769729              | 750                   | 0.10                     |
| Hispanic        | 204583              | 216                   | 0.11                     |
| Native American | 33725               | 30                    | 0.09                     |
| Other/unknown   | 335765              | 261                   | 0.08                     |
| Year            |                     |                       |                          |
| 2016            | 2366730             | 2123                  | 0.09                     |
| 2017            | 2448683             | 2274                  | 0.09                     |
| 2018            | 2556892             | 2307                  | 0.09                     |
| 2019            | 2372095             | 1951                  | 0.08                     |
| 2020            |                     |                       |                          |
| CCI             |                     |                       |                          |
| 0               | 4043224             | 2970                  | 0.07                     |
| 1-6             | 5276725             | 5083                  | 0.10                     |
| ≥7              | 424451              | 602                   | 0.14                     |

CCI=Charlson comorbidity index
