# Supplementary material
Source: HighWire-hosted journal article supplement (https://bjo.bmj.com/content/108/2/232)

### Supplemental Figure 1. Exclusion criteria of intraocular surgeries in Medicare beneficiaries from 2016 to 2019

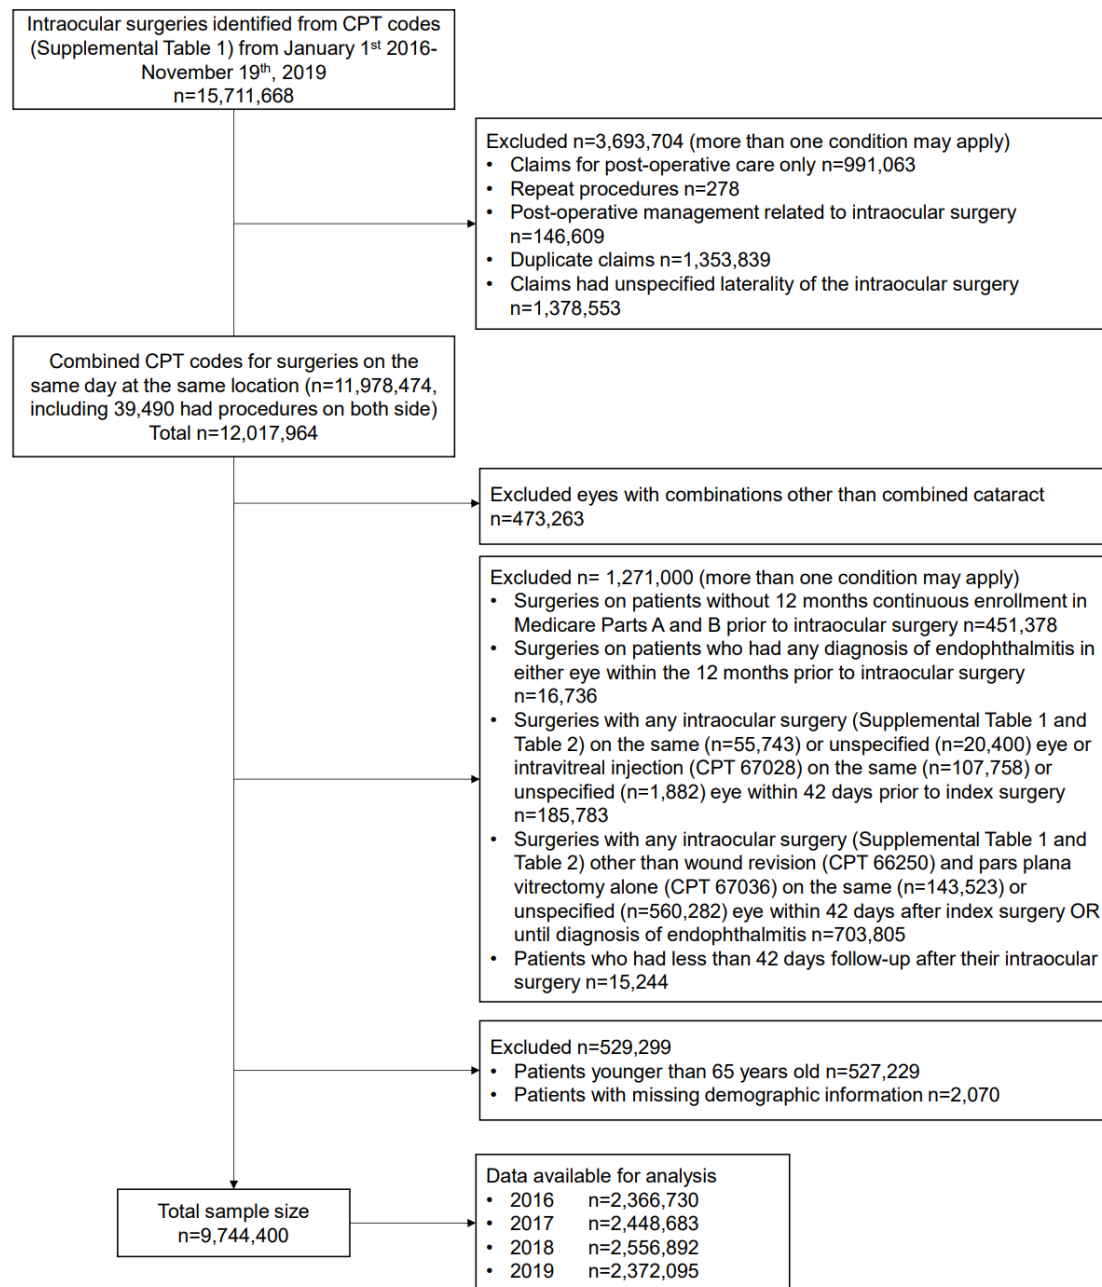

Supplement: inline-supplementary-material-2 [file inline-supplementary-material-2.pdf]
